# Supplementary material
Source: Springer Nature journal article supplement (https://www.springermedizin.de/resource/supplementary/12943_2009_690_MOESM15_ESM.pdf/9554586)

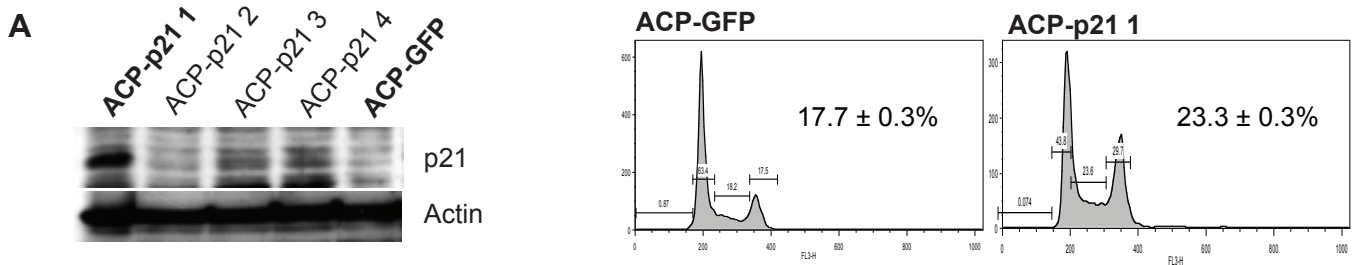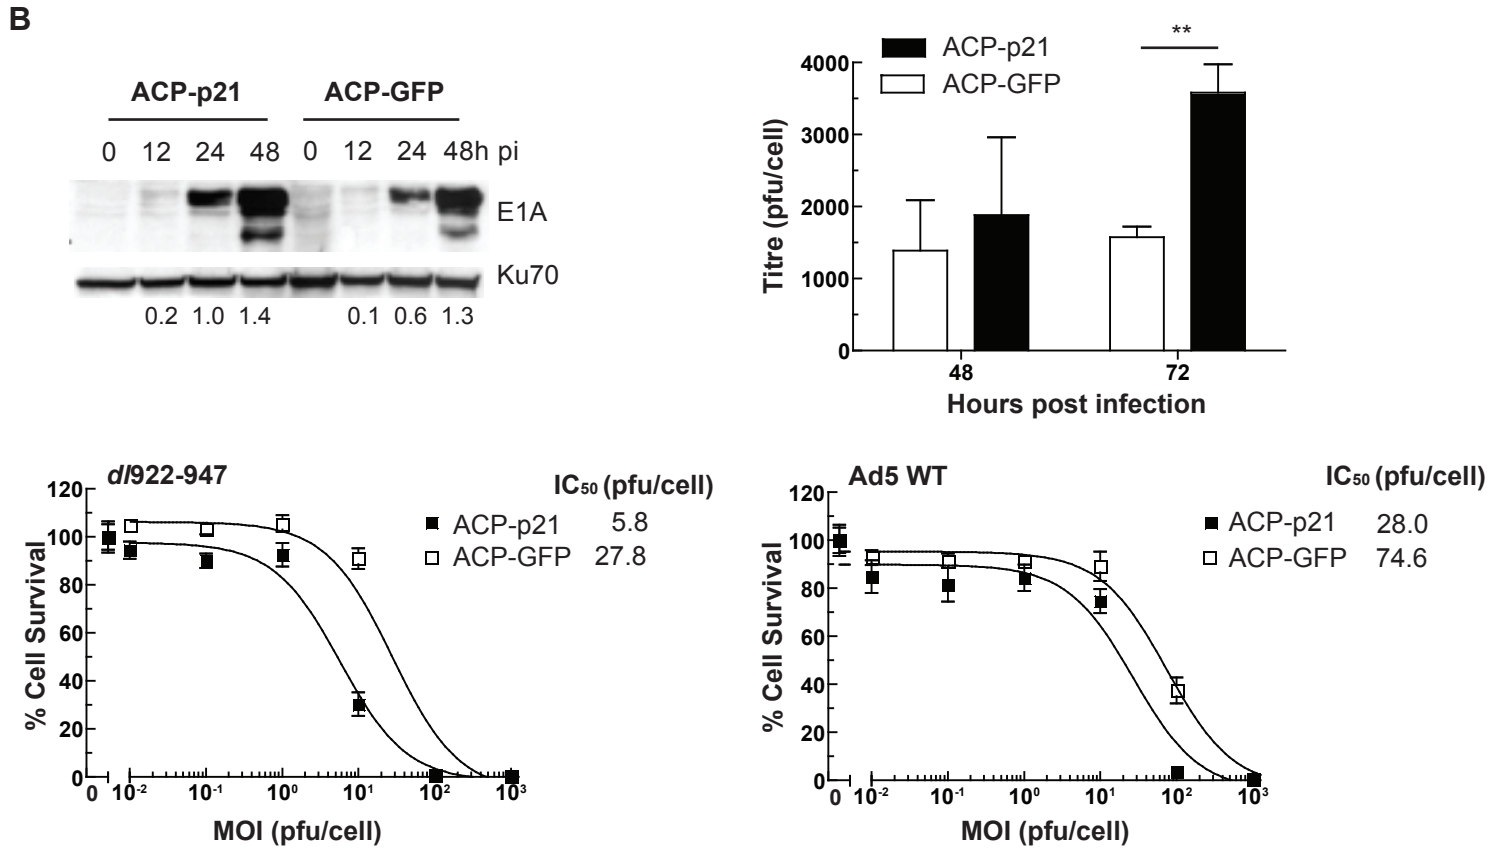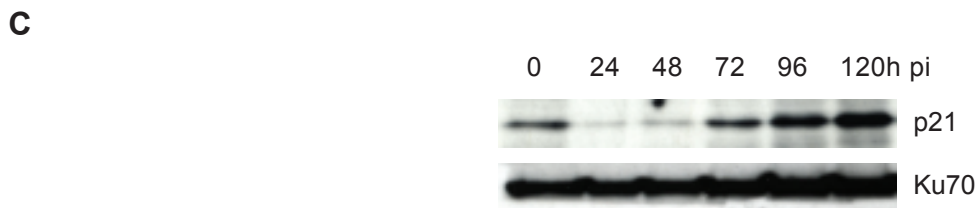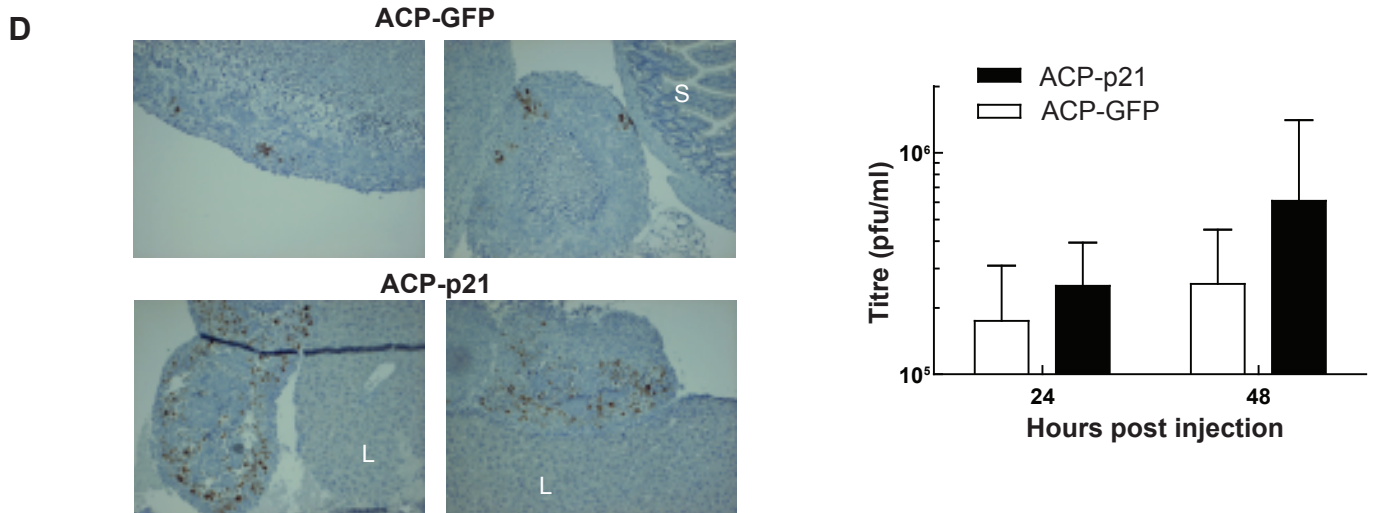

Supplement: MOESM15 [file 9554586]
